# Supplementary material for: Characterization of a Cutibacterium acnes Camp Factor 1-Related Peptide as a New TLR-2 Modulator in In Vitro and Ex Vivo Models of Inflammation
Source: MDPI journal article supplement (doi:10.3390/ijms23095065), 2022-05-03
Supplement: s1 [file s1]

## SUPPLEMENTARY MATERIAL

### Tables and Figures

#### Tables

**Table S1:** CAMP1-related peptides sequences analyzed in peptide array

| Peptide number | Location on glass slide | CAMP1 peptide sequence <sup>a</sup>                    |
|----------------|-------------------------|--------------------------------------------------------|
| 1              | A 1                     | M-K-V-K-F-L-A-A-P-L- <b>V</b> -V-G-A-L                 |
| 2              | A 2                     | F-L-A-A-P-L- <b>V</b> -V-G-A-L-M-A-P-A                 |
| 3              | A 3                     | P-L- <b>V</b> -V-G-A-L-M-A-P-A-A-F-S-G                 |
| 4              | A 4                     | G-A-L-M-A-P-A-A-F-S-G-A-T-A-H                          |
| 5              | A 5                     | A-P-A-A-F-S-G-A-T-A-H-A-A-P-V                          |
| 6              | A 6                     | F-S-G-A-T-A-H-A-A-P-V-A-P- <b>M</b> -V                 |
| 7              | A 7                     | T-A-H-A-A-P-V-A-P- <b>M</b> -V-A-V-S-A                 |
| 8              | A 8                     | A-P-V-A-P- <b>M</b> -V-A-V-S-A-T-Q-P-N                 |
| 9              | A 9                     | P- <b>M</b> -V-A-V-S-A-T-Q-P-N-K-T-L-S                 |
| 10             | A10                     | V-S-A-T-Q-P-N-K-T-L-S-V-A-E-A                          |
| 11             | A11                     | Q-P-N-K-T-L-S-V-A-E-A-Q-K-E-L                          |
| 12             | A12                     | T-L-S-V-A-E-A-Q-K-E-L-Q-V-V-N                          |
| 13             | A13                     | A-E-A-Q-K-E-L-Q-V-V-N-A-R-I-A                          |
| 14             | A14                     | K-E-L-Q-V-V-N-A-R-I-A-S-L-L-D                          |
| 15             | A15                     | V-V-N-A-R-I-A-S-L-L-D-T-Q-K-S                          |
| 16             | A16                     | R-I-A-S-L-L-D-T-Q-K-S-A-K-E-A                          |
| 17             | A17                     | L-L-D-T-Q-K-S-A-K-E-A-F-A-P-A                          |
| 18             | A18                     | Q-K-S-A-K-E-A-F-A-P-A-N-V- <b>T</b> -N                 |
| 19             | A19                     | K-E-A-F-A-P-A-N-V- <b>T</b> -N-I-I-G-K                 |
| 20             | A20                     | A-P-A-N-V- <b>T</b> -N-I-I-G-K-L-L-E-T                 |
| 21             | A21                     | V- <b>T</b> -N-I-I-G-K-L-L-E-T-A- <b>K</b> -R-I        |
| 22             | A22                     | I-G-K-L-L-E-T-A- <b>K</b> -R-I-K-E-A-L                 |
| 23             | A23                     | L-E-T-A- <b>K</b> -R-I-K-E-A-L-V-N- <b>I</b> -I        |
| 24             | A24                     | <b>K</b> -R-I-K-E-A-L-V-N- <b>I</b> -I-K-G-G- <b>V</b> |
| 25             | B 1                     | E-A-L-V-N- <b>I</b> -I-K-G-G- <b>V</b> -A-F-L-K        |
| 26             | B 2                     | N- <b>I</b> -I-K-G-G- <b>V</b> -A-F-L-K-S-I-P-T        |
| 27             | B 3                     | G-G- <b>V</b> -A-F-L-K-S-I-P-T-R-V-E-L                 |
| 28             | B 4                     | F-L-K-S-I-P-T-R-V-E-L-L-V-T-M                          |
| 29             | B 5                     | I-P-T-R-V-E-L-L-V-T-M-V-D-T-V                          |
| 30             | B 6                     | V-E-L-L-V-T-M-V-D-T-V-N-G-A-A                          |
| 31             | B 7                     | V-T-M-V-D-T-V-N-G-A-A-H-T-L-Q                          |
| 32             | B 8                     | D-T-V-N-G-A-A-H-T-L-Q-D-K-A-Q                          |
| 33             | B 9                     | G-A-A-H-T-L-Q-D-K-A-Q-P-A-H-S                          |
| 34             | B10                     | T-L-Q-D-K-A-Q-P-A-H-S-H-V-F-L                          |
| 35             | B11                     | K-A-Q-P-A-H-S-H-V-F-L-E-L-V-H                          |
| 36             | B12                     | A-H-S-H-V-F-L-E-L-V-H-A-S-V-L                          |
| 37             | B13                     | V-F-L-E-L-V-H-A-S-V-L-L-V- <b>A</b> -V                 |
| 38             | B14                     | L-V-H-A-S-V-L-L-V- <b>A</b> -V-S-A-T-S                 |
| 39             | B15                     | S-V-L-L-V- <b>A</b> -V-S-A-T-S-D-Q-L-K                 |
| 40             | B16                     | V- <b>A</b> -V-S-A-T-S-D-Q-L-K-D-E-M-A                 |

|    |     |                               |
|----|-----|-------------------------------|
| 41 | B17 | A-T-S-D-Q-L-K-D-E-M-A-A-V-K-K |
| 42 | B18 | Q-L-K-D-E-M-A-A-V-K-K-A-L-A-E |
| 43 | B19 | E-M-A-A-V-K-K-A-L-A-E-A-Q-K-M |
| 44 | B20 | V-K-K-A-L-A-E-A-Q-K-M-P-D-I-K |
| 45 | B21 | L-A-E-A-Q-K-M-P-D-I-K-P-N-D-G |
| 46 | B22 | Q-K-M-P-D-I-K-P-N-D-G-A-T-F-Y |
| 47 | B23 | D-I-K-P-N-D-G-A-T-F-Y-T-K-A-K |
| 48 | B24 | N-D-G-A-T-F-Y-T-K-A-K-L-A-R-V |
| 49 | C 1 | T-F-Y-T-K-A-K-L-A-R-V-L-R-Q-I |
| 50 | C 2 | K-A-K-L-A-R-V-L-R-Q-I-R-F-D-R |
| 51 | C 3 | A-R-V-L-R-Q-I-R-F-D-R-N-T-C-V |
| 52 | C 4 | R-Q-I-R-F-D-R-N-T-C-V-L-P-F-K |
| 53 | C 5 | F-D-R-N-T-C-V-L-P-F-K-R-L-G-T |
| 54 | C 6 | T-C-V-L-P-F-K-R-L-G-T-I-Y-F-L |
| 55 | C 7 | P-F-K-R-L-G-T-I-Y-F-L-S-R-A-L |
| 56 | C 8 | L-G-T-I-Y-F-L-S-R-A-L-L-K-A-T |
| 57 | C 9 | Y-F-L-S-R-A-L-L-K-A-T-G-V-L-M |
| 58 | C10 | R-A-L-L-K-A-T-G-V-L-M-E-P-L-V |
| 59 | C11 | K-A-T-G-V-L-M-E-P-L-V-R-V-S-E |
| 60 | C12 | V-L-M-E-P-L-V-R-V-S-E-V-D-Q-A |
| 61 | C13 | P-L-V-R-V-S-E-V-D-Q-A-I-T-D-V |
| 62 | C14 | V-S-E-V-D-Q-A-I-T-D-V-K-A-A-Y |
| 63 | C15 | D-Q-A-I-T-D-V-K-A-A-Y-Q-D-A-L |
| 64 | C16 | T-D-V-K-A-A-Y-Q-D-A-L-K-A-P-N |
| 65 | C17 | A-A-Y-Q-D-A-L-K-A-P-N-R-L-L-T |
| 66 | C18 | D-A-L-K-A-P-N-R-L-L-T-P-A-V-P |
| 67 | C19 | A-P-N-R-L-L-T-P-A-V-P-A-V-C-A |
| 68 | C20 | L-L-T-P-A-V-P-A-V-C-A-P-A-P-A |
| 69 | C21 | T-P-A-V-P-A-V-C-A-P-A-P-A-A-S |
| 70 | C22 | M-K-V-K-F-L-A-A-P-L-I-V-G-A-L |
| 71 | C23 | F-L-A-A-P-L-I-V-G-A-L-M-A-P-A |
| 72 | C24 | P-L-I-V-G-A-L-M-A-P-A-A-F-S-G |
| 73 | D 1 | F-S-G-A-T-A-H-A-A-P-V-A-P-I-V |
| 74 | D 2 | T-A-H-A-A-P-V-A-P-I-V-A-V-S-A |
| 75 | D 3 | A-P-V-A-P-I-V-A-V-S-A-T-Q-P-N |
| 76 | D 4 | P-I-V-A-V-S-A-T-Q-P-N-K-T-L-S |
| 77 | D 5 | Q-K-S-A-K-E-A-F-A-P-A-N-V-L-N |
| 78 | D 6 | K-E-A-F-A-P-A-N-V-L-N-I-I-G-K |
| 79 | D 7 | A-P-A-N-V-L-N-I-I-G-K-L-L-E-T |
| 80 | D 8 | V-L-N-I-I-G-K-L-L-E-T-A-R-R-I |
| 81 | D 9 | I-G-K-L-L-E-T-A-R-R-I-K-E-A-L |
| 82 | D10 | L-E-T-A-R-R-I-K-E-A-L-V-N-V-I |
| 83 | D11 | R-R-I-K-E-A-L-V-N-V-I-K-G-G-I |
| 84 | D12 | E-A-L-V-N-V-I-K-G-G-I-A-F-L-K |
| 85 | D13 | N-V-I-K-G-G-I-A-F-L-K-S-I-P-T |
| 86 | D14 | G-G-I-A-F-L-K-S-I-P-T-R-V-E-L |
| 87 | D15 | V-F-L-E-L-V-H-A-S-V-L-L-V-T-V |
| 88 | D16 | L-V-H-A-S-V-L-L-V-T-V-S-A-T-S |
| 89 | D17 | S-V-L-L-V-T-V-S-A-T-S-D-Q-L-K |
| 90 | D18 | V-T-V-S-A-T-S-D-Q-L-K-D-E-M-A |

|     |     |                                                    |
|-----|-----|----------------------------------------------------|
| 91  | D19 | V-K-K-A-L-A-E-A-Q-K-M-P-D-L-K                      |
| 92  | D20 | L-A-E-A-Q-K-M-P-D-L-K-P-N-D-V                      |
| 93  | D21 | Q-K-M-P-D-L-K-P-N-D-V-A-T-F-Y                      |
| 94  | D22 | D-L-K-P-N-D-V-A-T-F-Y-T-K-T-K                      |
| 95  | D23 | N-D-V-A-T-F-Y-T-K-T-K-L-S-R-V                      |
| 96  | D24 | T-F-Y-T-K-T-K-L-S-R-V-L-R-Q-I                      |
| 97  | E 1 | K-T-K-L-S-R-V-L-R-Q-I-R-F-D-R                      |
| 98  | E 2 | S-R-V-L-R-Q-I-R-F-D-R-N-T-C-V                      |
| 99  | E 3 | T-C-V-L-P-F-K-R-L-G-T-I-Y-F-M                      |
| 100 | E 4 | P-F-K-R-L-G-T-I-Y-F-M-S-R-A-L                      |
| 101 | E 5 | L-G-T-I-Y-F-M-S-R-A-L-L-K-A-T                      |
| 102 | E 6 | Y-F-M-S-R-A-L-L-K-A-T-G-V-L-M                      |
| 103 | E 7 | A-P-N-R-L-L-T-P-A-V-P-S-V-C-L                      |
| 104 | E 8 | L-L-T-P-A-V-P-S-V-C-L-P-A-P-A                      |
| 105 | E 9 | T-P-A-V-P-S-V-C-L-P-A-P-A-A-S                      |
| 106 | E10 | F-L-K-S-I-P-T-R-V-E-L-L- <b>L</b> -T-M             |
| 107 | E11 | I-P-T-R-V-E-L-L- <b>L</b> -T-M-V-D-T-V             |
| 108 | E12 | V-E-L-L- <b>L</b> -T-M-V-D-T-V-N-G-A-A             |
| 109 | E13 | <b>L</b> -T-M-V-D-T-V-N-G-A-A-H-T-L-Q              |
| 110 | E14 | R-I-A-S-L-L-D-T-Q-K-S-A-K- <b>K</b> -A             |
| 111 | E15 | L-L-D-T-Q-K-S-A-K- <b>K</b> -A-F-A-P-A             |
| 112 | E16 | Q-K-S-A-K- <b>K</b> -A-F-A-P-A-N-V-L-N             |
| 113 | E17 | K- <b>K</b> -A-F-A-P-A-N-V-L-N-I-I-G-K             |
| 114 | E18 | R-R-I-K-E-A-L-V-N-V-I-K-G-G- <b>V</b>              |
| 115 | E19 | E-A-L-V-N-V-I-K-G-G- <b>V</b> -A-F-L-K             |
| 116 | E20 | N-V-I-K-G-G- <b>V</b> -A-F-L-K-S-I-P-T             |
| 142 | F22 | <b>Bio</b> -A-A-N-W-S-H-P-Q-F-E-K-A-A <sup>b</sup> |
| 143 | F23 | G-K-P-I-P-N-P-L-L-G-L-D-S-T <sup>c</sup>           |
| 144 | F24 | N-D-Y-K-D-D-D-D-K-G-A-A-A <sup>d</sup>             |

<sup>a</sup>15-mer peptides were designed from the non-mutated (Accession number AAS92206.1) and mutated

(Accession number KX581410) CAMP1 protein sequences. Mutated amino acids are shown in red.

<sup>b</sup>Biotinylated peptide

<sup>c</sup>V5 epitope tag

<sup>d</sup>FLAG tag

**Table S2:** KEGG pathways and corresponding genes in skin explants stimulated with nmrCAMP1 and after CAMP1-related B2 peptide pretreatment

| KEGG pathway                           | KEGG identifier | nmrCAMP1 stimulation |                |           | B2-peptide treated + nmrCAMP1 stimulation |                |          | Gene name                                                                                                                                                                                                                                                                                                                                                                                                                                                                                                                                                                                            |
|----------------------------------------|-----------------|----------------------|----------------|-----------|-------------------------------------------|----------------|----------|------------------------------------------------------------------------------------------------------------------------------------------------------------------------------------------------------------------------------------------------------------------------------------------------------------------------------------------------------------------------------------------------------------------------------------------------------------------------------------------------------------------------------------------------------------------------------------------------------|
|                                        |                 | Gene count           | Gene Ratio (%) | P value   | Gene count                                | Gene Ratio (%) | P value  |                                                                                                                                                                                                                                                                                                                                                                                                                                                                                                                                                                                                      |
| Cytokine-cytokine receptor interaction | hsa04060        | 26                   | 10.24          | 4.94E-11  | 34                                        | 7.67           | 6.42E-12 | CSF3, <u>IL1RN</u> , <u>CSF2</u> , <u>CXCL8</u> , <u>CSF1</u> , <u>CXCL1</u> , <u>CXCL3</u> , <u>TNF</u> , <u>CXCL2</u> , <u>CXCL5</u> , <u>CCL4</u> , <u>CCL2</u> , <u>IL36RN</u> , <u>IL13RA2</u> , <u>IL11</u> , <u>IL33</u> , <u>TGFB2</u> , <u>TGFB3</u> , <u>CD70</u> , <u>IL1R1</u> , <u>TNFSF15</u> , <u>IL36G</u> , <u>IL16</u> , <u>PPBP</u> , <u>INHBA</u> , <u>NGF</u> , <u>BMP2</u> , <u>IL6</u> , <u>CXCL12</u> , <u>IL23A</u> , <u>IL1B</u> , <u>TNFSF9</u> , <u>IL7R</u> , <u>CCL26</u> , <u>CCL4L2</u> , <u>CCL3L3</u> , <u>CSF2RB</u> , <u>CCL5</u> , <u>IL15RA</u> , <u>CCL20</u> |
| IL-17 signaling pathway                | hsa04657        | 16                   | 6.3            | 7.36E-11  | 17                                        | 3.84           | 5.88E-09 | CSF3, <u>CXCL8</u> , <u>CSF2</u> , <u>MMP1</u> , <u>MMP3</u> , <u>TNFAIP3</u> , <u>CXCL1</u> , <u>CXCL3</u> , <u>PTGS2</u> , <u>CXCL2</u> , <u>TNF</u> , <u>MMP9</u> , <u>CXCL5</u> , <u>IL6</u> , <u>IL1B</u> , <u>CCL2</u> , <u>FOSB</u> , <u>CCL20</u> , <u>NFKB1A</u>                                                                                                                                                                                                                                                                                                                            |
| TNF signaling pathway                  | hsa04668        | 18                   | 7.09           | 8.511E-12 | 18                                        | 4.06           | 1.18E-08 | <u>CSF2</u> , <u>CSF1</u> , <u>MMP3</u> , <u>VEGFC</u> , <u>TNFAIP3</u> , <u>CXCL1</u> , <u>TRAF1</u> , <u>CXCL3</u> , <u>PTGS2</u> , <u>CXCL2</u> , <u>TNF</u> , <u>MMP9</u> , <u>CXCL5</u> , <u>IL6</u> , <u>IL1B</u> , <u>IRF1</u> , <u>CREB3L1</u> , <u>CCL2</u> , <u>NFKB1</u> , <u>CCL20</u> , <u>SELE</u> , <u>NFKBAI</u> , <u>CCL5</u> , <u>BIRC3</u>                                                                                                                                                                                                                                        |
| MAPK signaling pathway                 | hsa04010        | 14                   | 5.51           | 2.13E-03  | 27                                        | 6.09           | 1.80E-07 | <u>CSF1</u> , <u>RASGRF2</u> , <u>FGF2</u> , <u>TNF</u> , <u>DUSP16</u> , <u>CACNA1G</u> , <u>MECOM</u> , <u>STMN1</u> , <u>FLNC</u> , <u>CD14</u> , <u>DUSP5</u> , <u>TGFB2</u> , <u>ANGPT2</u> , <u>TGFB3</u> , <u>IL1R1</u> , <u>DUSP1</u> , <u>HGF</u> , <u>IGF2</u> , <u>VEGFC</u> , <u>NFATC1</u> , <u>HSPA2</u> , <u>NGF</u> , <u>EREG</u> , <u>GADD45G</u> , <u>KITLG</u> , <u>IL1B</u> , <u>EPHA2</u> , <u>NFKB1</u> , <u>GADD45A</u> , <u>HSPA1B</u> , <u>HSPA1A</u>                                                                                                                       |
| NF-kappa B signaling pathway           | hsa04064        | 19                   | 7.48           | 1.90E-13  | 15                                        | 3.39           | 1.09E-06 | <u>CXCL8</u> , <u>IL1R1</u> , <u>TNFAIP3</u> , <u>CXCL1</u> , <u>TRAF1</u> , <u>CXCL3</u> , <u>PTGS2</u> , <u>CXCL2</u> , <u>TNF</u> , <u>GADD45G</u> , <u>CXCL12</u> , <u>IL1B</u> , <u>CCL4</u> , <u>BCL2</u> , <u>CD14</u> , <u>NFKB1</u> , <u>DDX58</u> , <u>GADD45A</u> , <u>CLL4L2</u> , <u>TICAM1</u> , <u>NFKBIA</u> , <u>CYLD</u> , <u>BIRC3</u>                                                                                                                                                                                                                                            |
| Hematopoietic cell lineage             | hsa04640        | 6                    | 2.36           | 3.11E-02  | 14                                        | 3.16           | 3.53E-06 | <u>IL11</u> , <u>CSF3</u> , <u>ITGAM</u> , <u>CSF2</u> , <u>CSF1</u> , <u>IL1R1</u> , <u>ITGA1</u> , <u>TNF</u> , <u>IL6</u> , <u>KITLG</u> , <u>IL1B</u> , <u>CD14</u> , <u>CD36</u> , <u>IL7R</u>                                                                                                                                                                                                                                                                                                                                                                                                  |

|                                                               |          |    |      |          |    |      |          |                                                                                                                                                                                                                                                                                                                            |
|---------------------------------------------------------------|----------|----|------|----------|----|------|----------|----------------------------------------------------------------------------------------------------------------------------------------------------------------------------------------------------------------------------------------------------------------------------------------------------------------------------|
| Viral protein interaction with cytokine and cytokine receptor | hsa04061 | 14 | 5.51 | 1.91E-08 | 13 | 2.93 | 2.15E-05 | <u>CXCL8</u> , <u>CSF1</u> , <u>CXCL1</u> , <u>PPBP</u> , <u>CXCL3</u> , <u>CXCL2</u> , <u>TNF</u> , <u>CXCL5</u> , <u>IL6</u> , <u>CXCL12</u> , <u>CCL4</u> , CCL2, CCL26, <u>CCL3</u> , <u>CCL20</u> , <u>CCL3L3</u> , <u>CCL4L2</u> , <u>CCL5</u>                                                                       |
| NOD-like receptor signaling pathway                           | hsa04621 | 22 | 8.66 | 7.50E-12 | 14 | 3.16 | 1.99E-03 | <u>CXCL8</u> , TNFAIP3, <u>CXCL1</u> , <u>CXCL3</u> , <u>CXCL2</u> , <u>TNF</u> , <u>P2RX7</u> , <u>IL6</u> , OAS2, <u>IL1B</u> , <u>BCL2</u> , <u>CCL2</u> , GBP1, GBP3, <u>OAS1</u> , <u>OAS3</u> , <u>STAT1</u> , <u>RIPK2</u> , <u>TICAM1</u> , <u>NFKBAI</u> , <u>CCL5</u> , <u>CCL2</u> , <u>GBP4</u> , <u>BIRC3</u> |
| C-type lectin receptor signaling pathway                      | hsa04625 | 10 | 3.94 | 8.94E-05 | 8  | 1.81 | 2.69E-02 | <u>IL6</u> , <u>CALML5</u> , <u>IL23A</u> , <u>IL1B</u> , IRF1, NFATC1, PTGS2, <u>TNF</u> , <u>NFKB1</u> , <u>NFKBAI</u> , <u>CYLD</u> , <u>STAT1</u> , <u>IL23A</u>                                                                                                                                                       |
| FoxO signaling pathway                                        | hsa04068 | 9  | 3.54 | 2.24E-03 | 9  | 2.03 | 3.11E-02 | <u>IL6</u> , TGFB2, BCL6, <u>IRS1</u> , <u>TGFB3</u> , IL7R, SOD2, SGK1, GADD45G, <u>GADD45A</u> , <u>PLK2</u>                                                                                                                                                                                                             |
| Cellular senescence                                           | hsa04218 | 8  | 3.15 | 2.09E-02 | 10 | 2.26 | 3.16E-02 | <u>LIN54</u> , <u>IL6</u> , TGFB2, <u>CXCL8</u> , <u>CALML5</u> , <u>TGFB3</u> , RASSF5, NFATC1, NBN, GADD45G, <u>NFKB1</u> , <u>GADD45A</u>                                                                                                                                                                               |
| Chemokine signaling pathway                                   | hsa04062 | 15 | 5.91 | 7.15E-06 | 11 | 2.48 | 4.40E-02 | <u>GRK3</u> , <u>CXCL12</u> , <u>CXCL8</u> , <u>CCL4</u> , CCL2, <u>CXCL1</u> , <u>PPBP</u> , <u>CXCL3</u> , <u>CXCL2</u> , <u>CXCL5</u> , CCL26, <u>NFKB1</u> , <u>CCL3</u> , <u>STAT1</u> , <u>CCL20</u> , <u>CCL3L3</u> , <u>CCL4L2</u> , <u>CCL5</u> , <u>CCL2</u>                                                     |
| PI3K-Akt signaling pathway                                    | hsa04151 | /  | /    | n.s.     | 24 | 5.42 | 1.46E-04 | <u>CSF3</u> , ANGPT2, CSF1, <u>IRS1</u> , HGF, ITGA1, TNC, IGF2, FN1, VEGFC, NGF, FGF2, THBS1, EREG, <u>IL6</u> , KITLG, ITGA10, CREB3L1, BCL2, ITGA7, ITGB7, SGK1, IL7R, EPHA2                                                                                                                                            |
| ECM-receptor interaction                                      | hsa04512 | /  | /    | n.s.     | 9  | 2.03 | 3.20E-03 | FRAS1, ITGA10, ITGA1, TNC, FN1, ITGA7, ITGB7, CD36, THBS1                                                                                                                                                                                                                                                                  |
| PPAR signaling pathway                                        | hsa03320 | /  | /    | n.s.     | 8  | 1.81 | 4.95E-03 | FADS2, FABP4, FABP5, MMP1, ME1, LPL, PPARG, CD36                                                                                                                                                                                                                                                                           |
| Glycerolipid metabolism                                       | hsa00561 | /  | /    | n.s.     | 7  | 1.58 | 7.06E-03 | DGAT2, ALDH1B1, AKR1B1, LPL, PLPP3, GLA, PNLIIPRP3                                                                                                                                                                                                                                                                         |
| Ras signaling pathway                                         | hsa04014 | /  | /    | n.s.     | 14 | 3.16 | 1.37E-02 | ANGPT2, CSF1, CALML5, RASGRF2, HGF, IGF2, VEGFC, PLA2G3, NGF, RASAL3, FGF2, KITLG, RASSF5, EPHA2                                                                                                                                                                                                                           |
| Rap1 signaling pathway                                        | hsa04015 | /  | /    | n.s.     | 13 | 2.93 | 1.52E-02 | ITGAM, ANGPT2, CSF1, CALML5, HGF, VEGFC, NGF, FGF2, THBS1, KITLG, ADORA2A, RASSF5, EPHA2                                                                                                                                                                                                                                   |
| TGF-beta signaling pathway                                    | hsa04350 | /  | /    | n.s.     | 8  | 1.81 | 1.63E-02 | TGFB2, BMP2, TGFB3, FST, INHBA, THBS1, <u>TNF</u> , SMAD7                                                                                                                                                                                                                                                                  |
| Focal adhesion                                                | hsa04510 | /  | /    | n.s.     | 12 | 2.71 | 2.62E-02 | ITGA10, CAV1, HGF, ITGA1, BCL2, TNC, FN1, VEGFC, ITGA7, ITGB7, FLNC, THBS1                                                                                                                                                                                                                                                 |
| Toll-like receptor signaling pathway                          | hsa04620 | 13 | 5.12 | 2.67E-07 | /  | /    | n.s.     | <u>CXCL8</u> , <u>STAT1</u> , <u>CCL3L3</u> , <u>CCL4L2</u> , <u>TICAM1</u> , <u>TNF</u> , <u>NFKB1</u> , <u>NFKBIA</u> , <u>IL6</u> , <u>IL1B</u> , <u>CCL5</u> , <u>CCL4</u> , <u>CCL3</u>                                                                                                                               |

|                                       |          |    |      |          |   |   |      |                                                                                             |
|---------------------------------------|----------|----|------|----------|---|---|------|---------------------------------------------------------------------------------------------|
| Cytosolic DNA-sensing pathway         | hsa04623 | 8  | 3.15 | 1.67E-04 | / | / | n.s. | <i>NFKB1A, <u>IL6</u>, DDX58, CCL5, <u>IL1B</u>, CCL4L2, <u>CCL4</u>, NFKB1</i>             |
| Apoptosis                             | hsa04210 | 11 | 4.33 | 1.67E-04 | / | / | n.s. | <i>NFKB1A, GADD45A, PMAIP1, CSF2RB, TRAF1, NGF, <u>TNF</u>, CTSS, NFKB1, GADD45G, BIRC3</i> |
| RIG-I-like receptor signaling pathway | hsa04622 | 8  | 3.15 | 2.67E-04 | / | / | n.s. | <i>IFIH1, NFKB1A, CYLD, <u>CXCL8</u>, DDX58, ISG15, <u>TNF</u>, NFKB1</i>                   |
| Necroptosis                           | hsa04217 | 10 | 3.94 | 2.67E-03 | / | / | n.s. | <i>CYLD, STAT1, <u>IL1B</u>, TNFAIP3, EIF2AK2, PYGM, TICAM1, <u>TNF</u>, H2AC18, BIRC3</i>  |
| JAK-STAT signaling pathway            | hsa04630 | 8  | 3.15 | 2.67E-02 | / | / | n.s. | <i>IL15RA, CSF3, <u>IL6</u>, <u>CSF2</u>, STAT1, IL23A, CSF2RB, IL7R</i>                    |
| Th17 cell differentiation             | hsa04659 | 6  | 2.36 | 4.67E-02 | / | / | n.s. | <i>NFKB1A, <u>IL6</u>, STAT1, IL23A, <u>IL1B</u>, NFKB1</i>                                 |
| Antigen processing and presentation   | hsa04612 | 5  | 1.97 | 4.67E-02 | / | / | n.s. | <i>HSPA2, <u>TNF</u>, CTSS, HSPA1B, HSPA1A</i>                                              |

Gene name : differentially expressed genes present in both conditions

Gene name : differentially expressed genes present in both conditions and validated in qPCR

**Gene name** : differentially expressed genes present in B2-peptide treated + nmrCAMP1 condition

**Gene name** : differentially expressed genes present in B2-peptide treated + nmrCAMP1 condition and validated in qPCR

*Gene name* : differentially expressed genes present in nmrCAMP1 condition

Gene name : differentially expressed genes present in nmrCAMP1 condition and validated in qPCR

n.s. : none significant

**Table S3:** Primer used in this study

| Name          | Forward                      | Reverse                  |
|---------------|------------------------------|--------------------------|
| CAMP1F1       | CACCATGAAGGTTAAGTTCTTAGCAGCG | GGAGGCGGCCGGAGCAGG       |
| IL-1β         | TCCTGCGTGTTGAAAGATGATAA      | CAAATCGCTTTTCCATCTTCTTC  |
| CXCL8/IL-8    | TCTTGGCAGCCTTCCTGATT         | TTTCTGTGTTGGCGCAGTGT     |
| TNF-α         | GAGCACTGAAAGCATGATCC         | CGAGAAGATGATCTGACTGCC    |
| GM-CSF (CSF2) | GGAGCATGTGAATGCCATCCAG       | CTGGAGGTCAAACATTTCTGAGAT |
| GAPDH         | GCCACATCGCTCAGACAC           | GCCCAATACGACCAAATCC      |
| IL-10         | TCTCCGAGATGCCTTCAGCAGA       | TCAGACAAGGCTTGGCAACCCA   |

## FIGURES

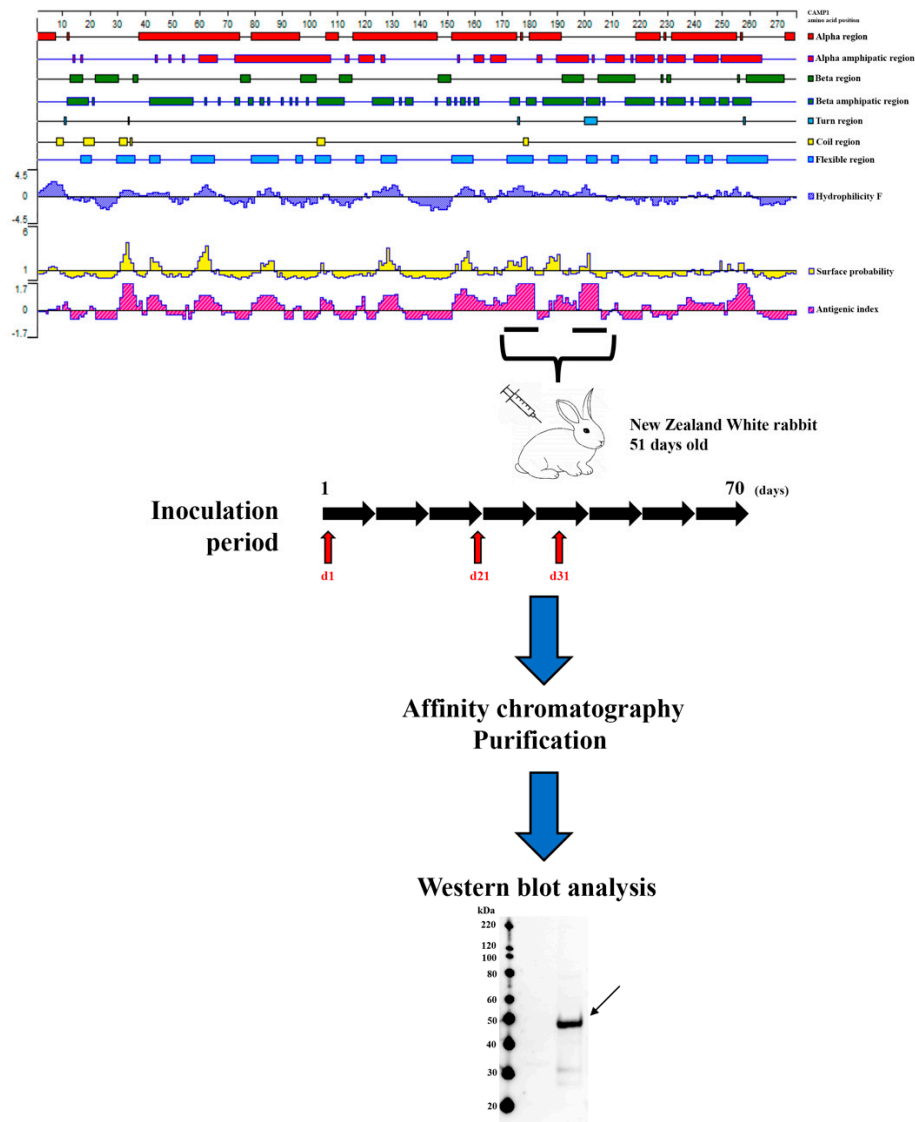

**Figure S1:** Polyclonal antibodies production against *C. acnes* CAMP factor 1. Two peptides from the *C. acnes* CAMP1 protein sequence (accession number AAS92206.1) with a high antigenic index (KMPDLKPNDVAT and VLRQIRFDRNTC) were injected three times over a period of 70 days in New Zealand white female rabbits. Antibodies against CAMP1 were purified by affinity chromatography. Western Blot analysis was performed on recombinant CAMP1 protein (50 µg) separated by electrophoresis in a 4–12% NuPAGE SDS BisTris gel and transferred onto nitrocellulose membrane and incubated with the polyclonal antibodies (10 µg/ml). The arrow indicates the detection of the recombinant CAMP1 (47 kDa).



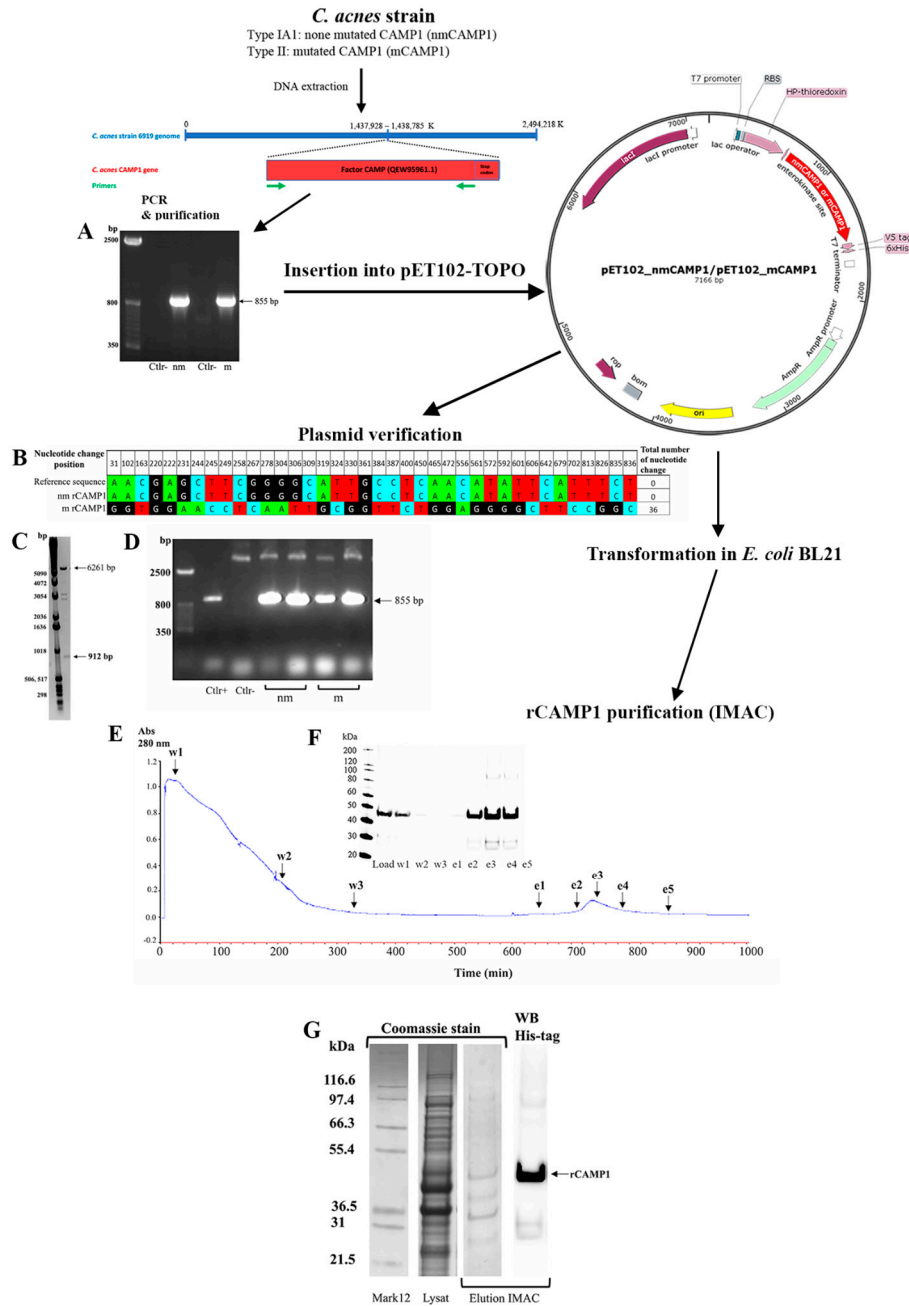

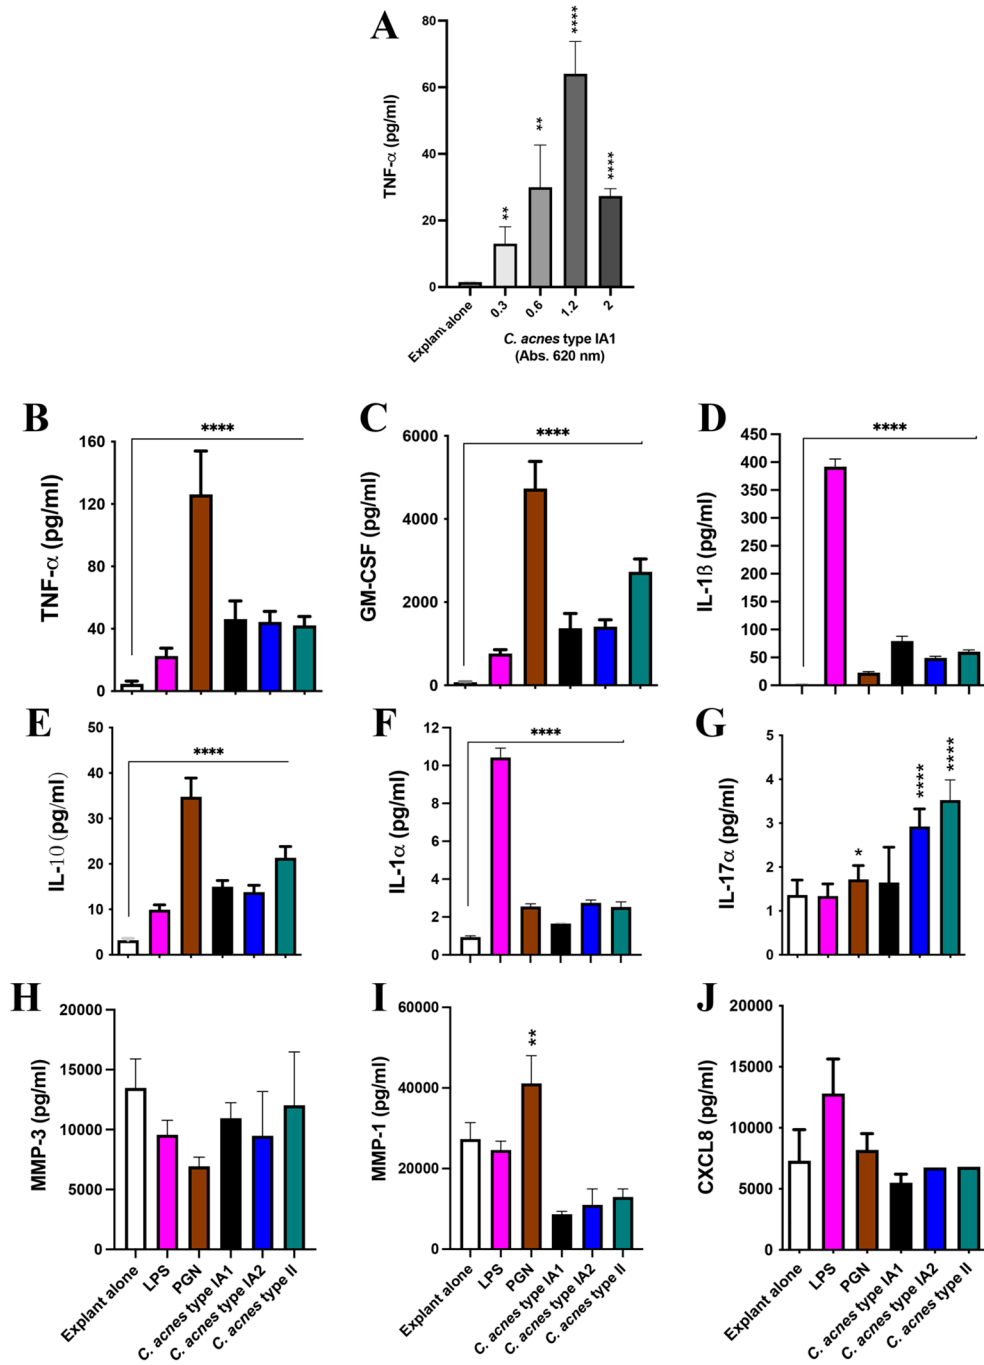

**Figure S3:** *C. acnes*-induced inflammation in *ex vivo* human skin explants. Human skin explants were left unstimulated (Explant alone) (white bar), (A) were stimulated with *C. acnes* suspensions at OD<sub>620 nm</sub> values of 0.3 to 2.0 for 18 h (the data shown are means  $\pm$  SEM,  $n = 3$ ), or (B-J) were stimulated with LPS (5  $\mu$ g/ml), PGN (5  $\mu$ g/ml) and by *C. acnes* of various phylotypes (IA1, IA2 and II) at an OD<sub>620 nm</sub> of 1.0 for 18 h (the data shown are means  $\pm$  SEM,  $n = 6$ ). (A) TNF $\alpha$  production was measured by ELISA in culture supernatant. (B-J) TNF $\alpha$ , GM-CSF, IL-1 $\beta$ , IL-10, IL-1 $\alpha$ , IL-17 $\alpha$ , MMP-3, MMP-1 and CXCL8/IL-8 levels were measured by Luminex in culture supernatant, respectively. Statistical significance is indicated by \* ( $P < 0.05$ ), \*\* ( $P < 0.01$ ), \*\*\* ( $P < 0.001$ ), and \*\*\*\* ( $P < 0.0001$ ).

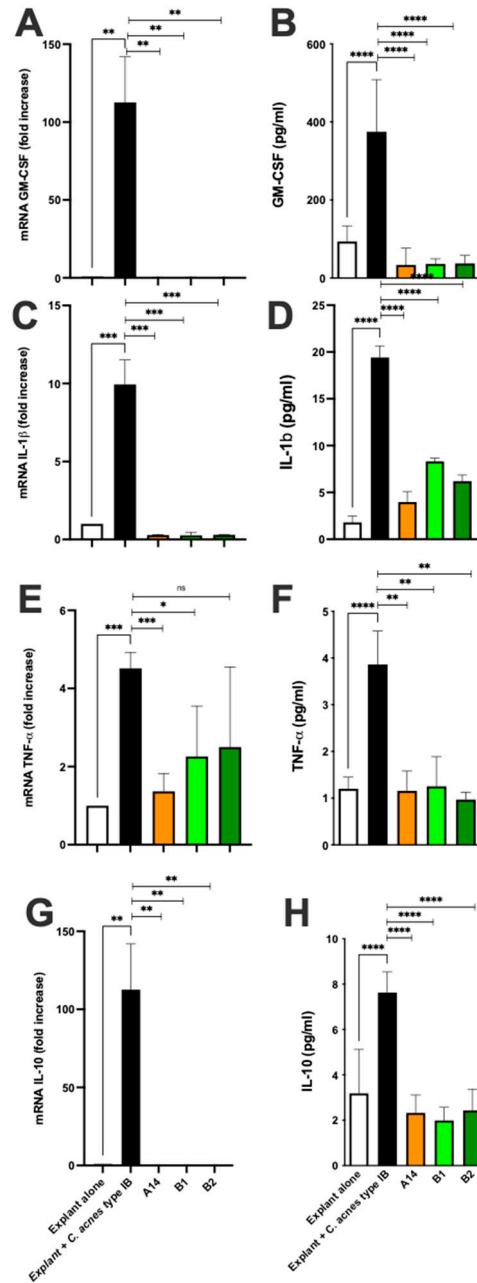

**Figure S4:** CAMP1-related peptides inhibit the production of *C. acnes*-induced proinflammatory molecules production *ex vivo*. Human skin explants were left untreated and unstimulated (Explant alone), stimulated by *C. acnes* type IB (O.D.<sub>620 nm</sub> = 1.0) (Explant + *C. acnes* type IB), or were treated with A14, B1 and B2 peptide (62.5  $\mu$ M) for 24 h and then stimulated by *C. acnes* for 18 h. (A, C, E, G) The levels of GM-CSF, IL-1 $\beta$ , TNF- $\alpha$  and IL-10 mRNA were measured by qRT-PCR. (B, D, F, H) The levels of GM-CSF, IL-1 $\beta$ , TNF- $\alpha$  and IL-10 productions were measured by Luminex in culture supernatant, respectively. The data shown are means  $\pm$  SEM ( $n = 3$ ). Statistical significance is indicated by \* ( $P < 0.05$ ), \*\* ( $P < 0.01$ ), \*\*\* ( $P < 0.001$ ), and \*\*\*\* ( $P < 0.0001$ ).

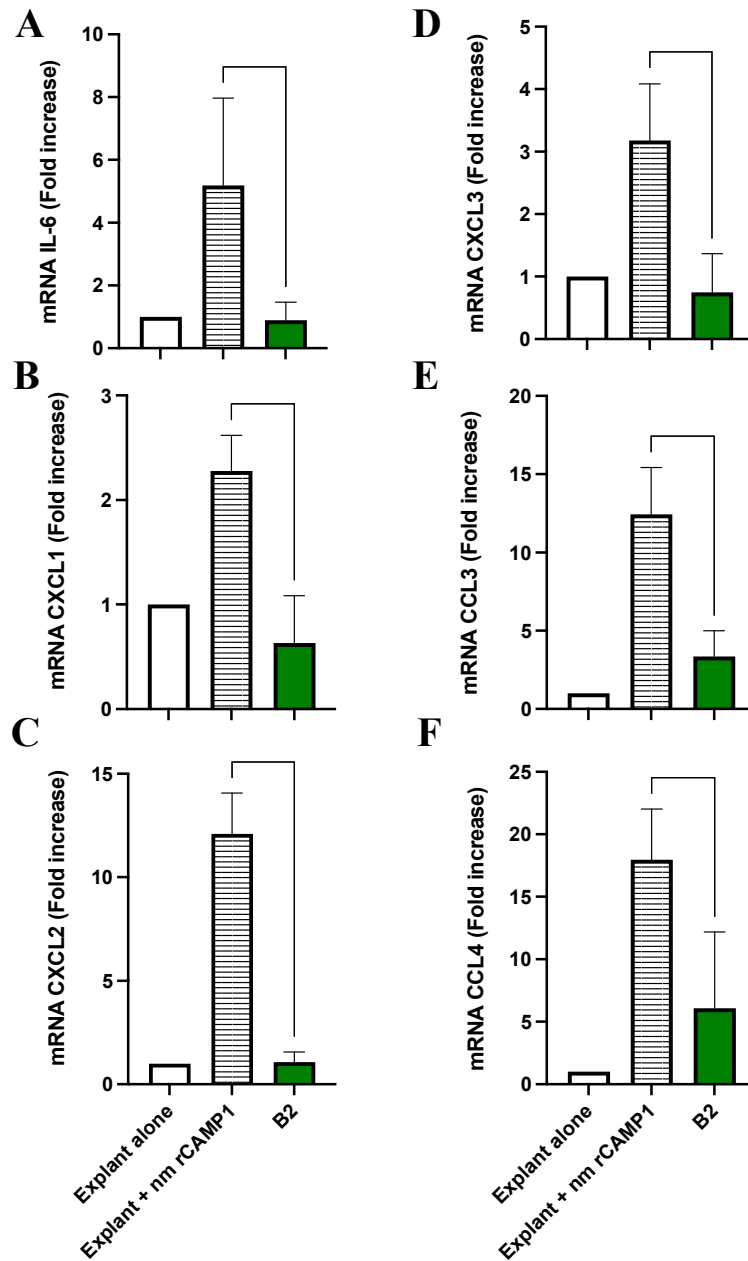

**Figure S5:** CAMP1-related B2 peptide inhibits the transcription of nmrCAMP1-induced proinflammatory molecules production *ex vivo*. Human skin explants were left untreated and unstimulated (Explant alone), were stimulated with nmrCAMP1 (Explant + nmrCAMP1), or were treated with B2 peptide (62.5  $\mu$ M) for 24 h and then stimulated with nmrCAMP1 for 18 h. The levels of (A) IL6, (B) CXCL1, (C) CXCL2, (D) CXCL3, (E) CCL3, (F) CCL4 expression is assessed by qRT-PCR. The data shown are means  $\pm$  SEM ( $n = 3$ ). Statistical significance is indicated by \* ( $P < 0.05$ ), \*\* ( $P < 0.01$ ), \*\*\* ( $P < 0.001$ ), and \*\*\*\* ( $P < 0.0001$ ).
